# Supplementary material for: Building Consensus on the Point-of-Care Ultrasound Skills Required for Effective Healthcare Service Delivery at District Hospitals in South Africa: A Delphi Study
Source: MDPI journal article supplement (doi:10.3390/ijerph20237126), 2023-11-30
Supplement: s1 [file s1]

## Supplementary material 2: Expert consensus on POCUS skillsets

|        |                                                                                                                                                           |           |    |
|--------|-----------------------------------------------------------------------------------------------------------------------------------------------------------|-----------|----|
| 1.1.1  | Identification of the presence of an intrauterine pregnancy                                                                                               | Essential | R1 |
| 1.1.2  | Determine the viability of an intrauterine pregnancy                                                                                                      | Essential | R1 |
| 1.1.3  | Detection of the foetal heart rate using M-Mode                                                                                                           | Essential | R2 |
| 1.1.4  | First trimester pregnancy gestational age assessment by crown rump length detection                                                                       | Essential | R1 |
| 1.1.5  | Recognition of molar pregnancy                                                                                                                            | Essential | R1 |
| 1.2.1  | Determine placental position                                                                                                                              | Essential | R1 |
| 1.2.2  | Determine the foetal presentation                                                                                                                         | Essential | R1 |
| 1.2.3  | Perform a gestational age assessment and foetal weight estimation using abdominal circumference (AC), biparietal diameter (BPD), and femoral length (FL). | Essential | R1 |
| 1.2.10 | Confirmation of foetal death                                                                                                                              | Essential | R1 |
| 1.2.4  | Assess the amniotic fluid volume using either the four-quadrant calculation or deepest single pocket approach                                             | Essential | R2 |
| 1.2.5  | Assess the placenta for features of placental abruption                                                                                                   | Essential | R2 |
| 1.2.8  | Assess foetal well-being using the biophysical profile                                                                                                    | Essential | R4 |
| 1.2.9  | Assess foetal well-being during third trimester using umbilical artery doppler                                                                            | Essential | R5 |
| 1.3.1  | Confirmation of intrauterine device (IUD) position                                                                                                        | Essential | R3 |
| 1.3.2  | Measurement of endometrial thickness                                                                                                                      | Essential | R2 |
| 1.3.3  | Assessment of an adnexal mass: simple, complex and haemorrhagic cysts                                                                                     | Essential | R5 |
| 2.1    | Detection of a pericardial effusion                                                                                                                       | Essential | R1 |
| 2.10   | Measurement of inferior vena cava (IVC) diameter and collapsibility to approximate volume status                                                          | Essential | R5 |
| 2.2    | Assessment of global left ventricle contractility (hyperdynamic / normal / decreased)                                                                     | Essential | R4 |
| 3.1    | Assessment of free fluid in the abdominal cavity                                                                                                          | Essential | R1 |
| 3.2    | Assessment of free fluid around the heart with a sub-xyphoid view                                                                                         | Essential | R1 |
| 3.3    | Assessment of a pneumothorax                                                                                                                              | Essential | R2 |
| 3.4    | Assessment of a haemothorax                                                                                                                               | Essential | R2 |

|       |                                                                                             |               |    |
|-------|---------------------------------------------------------------------------------------------|---------------|----|
| 4.1.1 | Detection of an abdominal aortic aneurysm                                                   | Essential     | R3 |
| 4.2.1 | Assess the gallbladder for cholelithiasis                                                   | Essential     | R2 |
| 4.2.2 | Assess for acute cholecystitis                                                              | Essential     | R2 |
| 4.2.3 | Assess for common bile duct (CBD) obstruction<br>(Choledocholithiasis)                      | Essential     | R5 |
| 4.2.4 | Assess for hepato-splenomegaly                                                              | Essential     | R5 |
| 4.4.1 | Assess renal size                                                                           | Essential     | R4 |
| 4.4.5 | Identify a testicular torsion                                                               | Essential     | R2 |
| 5.1   | Identify lower extremity DVT in low-risk cases with 2-Zone discrimination technique         | Essential     | R1 |
| 5.2   | Identify lower extremity DVT with colour Doppler, and graded compression of the entire limb | Essential     | R3 |
| 7.1   | Identification of pulmonary oedema                                                          | Essential     | R5 |
| 7.3   | Identification of pneumothorax                                                              | Essential     | R2 |
| 7.4   | Identification of pleural effusion or haemothorax                                           | Essential     | R2 |
| 9.1   | Thoracentesis                                                                               | Essential     | R2 |
| 9.2   | Paracentesis                                                                                | Essential     | R2 |
| 9.3   | Peripheral IV placement                                                                     | Essential     | R2 |
| 9.4   | Central line placement                                                                      | Essential     | R1 |
| 9.7   | Foreign body identification and removal                                                     | Essential     | R2 |
| 9.8   | Fine needle aspiration/biopsy                                                               | Essential     | R2 |
| 10.1  | FAST/E-FAST: Focused assessment with sonography for trauma                                  | Essential     | R1 |
| 10.2  | RUSH: Rapid ultrasound for shock and hypotension                                            | Essential     | R2 |
| 10.3  | BLUE: Bedside lung ultrasound in emergency                                                  | Essential     | R2 |
| 10.4  | CLUE: Cardiac limited ultrasound exam                                                       | Essential     | R2 |
| 4.4.2 | Identify and grade hydronephrosis                                                           | No agreement  | R3 |
| 4.4.3 | Identify urinary retention and post-void residual volume                                    | No agreement  | R4 |
| 6.7   | Identification of rotator cuff injury                                                       | No agreement  | R3 |
| 1.2.7 | Determine foetal gender after 18 weeks                                                      | Non Essential | R3 |

|       |                                                                                                                                           |                  |    |
|-------|-------------------------------------------------------------------------------------------------------------------------------------------|------------------|----|
| 2.9   | Assessment of right ventricle function using TAPSE                                                                                        | Non<br>Essential | R4 |
| 6.10  | Assessment of carpal tunnel syndrome                                                                                                      | Non<br>Essential | R4 |
| 6.6   | Identification of tendonitis/tendinopathy                                                                                                 | Non<br>Essential | R4 |
| 6.8   | Identification of a ligament injury of the knee                                                                                           | Non<br>Essential | R4 |
| 6.9   | Identification of a ligament injury of the ankle                                                                                          | Non<br>Essential | R4 |
| 7.6   | Identification of interstitial pneumonia                                                                                                  | Non<br>Essential | R3 |
| 7.8   | Identification of chronic interstitial lung disease                                                                                       | Non<br>Essential | R4 |
| 8.1   | Identification of detached retina                                                                                                         | Non<br>Essential | R3 |
| 8.2   | Identification of vitreous detachment                                                                                                     | Non<br>Essential | R3 |
| 8.3   | Identification of vitreous haemorrhage                                                                                                    | Non<br>Essential | R3 |
| 8.4   | Identification of intraocular foreign body                                                                                                | Non<br>Essential | R3 |
| 8.5   | Measurement of posterior ocular nerve sheath diameter for assessment of intracranial pressure (papilledema)                               | Non<br>Essential | R4 |
| 8.6   | Identification of a lens dislocation                                                                                                      | Non<br>Essential | R2 |
| 9.5   | Lumbar puncture                                                                                                                           | Non<br>Essential | R3 |
| 1.2.6 | Evaluation of cervical length to assess cervical insufficiency                                                                            | Optional         | R3 |
| 1.3.4 | Identification of an ovarian torsion                                                                                                      | Optional         | R4 |
| 1.3.5 | Assessment of a breast mass                                                                                                               | Optional         | R4 |
| 10.5  | FEEDS criteria: To determine presence IUP                                                                                                 | Optional         | R4 |
| 2.3   | Calculation of left ventricle ejection fraction through radial contractility (Teicholtz)/ mitral annular plane systolic excursion (Mapse) | Optional         | R4 |
| 2.4   | Assessment of left ventricular hypertrophy                                                                                                | Optional         | R3 |
| 2.5   | Assessment of diastolic dysfunction                                                                                                       | Optional         | R4 |

|       |                                                                                                             |          |    |
|-------|-------------------------------------------------------------------------------------------------------------|----------|----|
| 2.6   | Assessment of regional wall motion abnormalities                                                            | Optional | R3 |
| 2.7   | Assessment of valvular abnormalities                                                                        | Optional | R3 |
| 2.8   | Assessment of right ventricle size and strain and the possibility of PE in the appropriate clinical setting | Optional | R5 |
| 4.1.2 | Detection of an abdominal aortic dissection                                                                 | Optional | R3 |
| 4.1.3 | Detection of a proximal aortic root aneurysm or dissection                                                  | Optional | R4 |
| 4.3.1 | Assess for appendicitis                                                                                     | Optional | R3 |
| 4.3.2 | Identify an abdominal wall hernia                                                                           | Optional | R4 |
| 4.3.3 | Identify an inguinal hernia                                                                                 | Optional | R4 |
| 4.4.4 | Identify a varicocele                                                                                       | Optional | R4 |
| 4.4.6 | Identify epididymo-orchitis                                                                                 | Optional | R3 |
| 4.4.7 | Assess prostate volume                                                                                      | Optional | R4 |
| 5.3   | Identify upper extremity DVT with colour Doppler, and graded compression of the entire limb                 | Optional | R3 |
| 6.1   | Differentiating between cellulitis and an abscess in soft tissue                                            | Optional | R4 |
| 6.2   | Identification of a foreign body                                                                            | Optional | R4 |
| 6.3   | Identification of a joint effusions/bursitis                                                                | Optional | R3 |
| 6.4   | Identification of long bone fractures                                                                       | Optional | R5 |
| 6.5   | Identification of tendon rupture/tear                                                                       | Optional | R3 |
| 7.2   | Identification of a lobar pneumonia                                                                         | Optional | R4 |
| 7.5   | Assessment of pleural mass                                                                                  | Optional | R4 |
| 7.7   | Identification of Acute Respiratory Distress Syndrome (ARDS)                                                | Optional | R4 |
| 9.10  | Peripheral nerve blocks                                                                                     | Optional | R3 |
| 9.6   | Knee aspiration and injection                                                                               | Optional | R4 |
| 9.9   | Shoulder, ankle, hip, wrist aspiration, and injection                                                       | Optional | R2 |
