# Supplementary material for: Building Consensus on the Point-of-Care Ultrasound Skills Required for Effective Healthcare Service Delivery at District Hospitals in South Africa: A Delphi Study
Source: Int J Environ Res Public Health. 2023 Nov 30;20(23):7126. doi: 10.3390/ijerph20237126 (PMC10705875; doi:10.3390/ijerph20237126)
Supplement: Supplementary file 1 [file ijerph-20-07126-s001.zip › Supplementary Material 1- Starting Questionairre.csv]

No	Skillset	Article link	Author
1.1.1	Identification of the presence of an intrauterine pregnancy	DOI: 10.1148/rg.2015150092	Rogers 2015
1.1.2	Determine the viability of an intrauterine pregnancy	doi.org/10.1016/j.rcl.2019.01.006	Wang 2019
1.1.3	Detection of the fetal heart rate using M-Mode	doi.org/10.14366/usg.19043	Murugan 2020
1.1.4	First trimester pregnancy gestational age assessment by crown rump length detection	DOI: 10.1148/rg.2015150092	Rogers 2015
1.1.5	Recognition of molar pregnancy	doi.org/10.1016/j.rcl.2019.01.006	Wang 2019
1.2.1	Determine placental position	DOI: 10.1002/uog.8829	Salomon 2010
1.2.2	Determine the fetal presentation	DOI: 10.1002/uog.8830	Salomon 2010
1.2.3	Perform a gestational age assessment and fetal weight estimation using abdominal circumference (AC), biparietal diameter (BPD), and femoral length (FL).	DOI: 10.1002/uog.8831	Salomon 2010
1.2.4	Assess the amniotic fluid volume using either the 4 quadrant calculation or deepest single pocket approach	DOI 10.1055/s-2007-986689	Magann 2007
1.2.5	Assess the placenta for features of placental abruption	doi.org/10.1007/s10140-018-1638-3	Fadl 2018
1.2.6	Evaluation of cervical length to assess cervical insufficiency	Doi.org/10.1016/S1028-4559(08)60126-6	Chao 2008
1.2.7	Determine fetal gender after 18weeks	doi: 10.1097/OGX.0b013e318193299b	Odeh 2009
1.2.8	Assess fetal well-being using the biophysical profile	doi.org/10.1016/B978-0-323-44548-1.00125-X	Han 2017
1.2.9	Assess fetal well-being during third trimester using umbilical artery doppler	doi:10.1097/grf.0b013e3181fbb5	Maulik 2010
1.2.10	Confirmation of fetal death
1.3.1	Confirmation of intrauterine device (IUD) position	doi:10.1179/174227104225011722�	Andrews 2004
1.3.2	Measurement of endometrial thickness	doi:10.1016/j.ajog.2009.02.006�	Goldstein 2007
1.3.3	Assessment of an adnexal mass: simple, complex and haemorrhagic cysts	doi:10.1097/01.ruq.0000263849.45926.cb�	Brown 2007
1.3.4	Identification of an ovarian torsion	DOI: 10.1111/j.1744-4667.2012.00131.x	Damigos 2017
1.3.5	Assessment of a breast mass	doi.org/10.1007/s40134-019-0316-x	Burgess 2019
2.1	Detection of a pericardial effusion	doi:10.1016/j.ajem.2018.11.004	Alerhand 2018
2.2	Assessment of global left ventricle contractility (hyperdynamic / normal / decreased)
2.3	Calculation of left ventricle ejection fraction through radial contractility (Teicholtz)/ mitral annular plane systolic excursion (Mapse)	DOI: 10.4103/0971-9784.192617	Chengode 2016
2.4	Assessment of left ventricular hypertrophy	DOI: 10.1093/ehjci/jev014	Lang 2015
2.5	Assessment of diastolic dysfunction	DOI: 10.1177/8756479319836781	Kossaify 2019
2.6	Assessment of regional wall motion abnormalities	DOI: 10.1016/j.echo.2009.12.020	Blondheim 2010
2.7	Assessment of valvular abnormalities	doi:10.1093/eurheartj/ehab395	Vahanian 2022
2.8	Assessment of right ventricle size and strain and the possibility of PE in the appropriate clinical setting	DOI:10.1016/j.accpm.2021.100852	Alerhand 2021
2.9	Assessment of right ventricle function using TAPSE	doi.org/10.1016/j.jemermed.2019.09.017	Alerhand 2019
2.10	Measurement of inferior vena cava (IVC) diameter and collapsibility to approximate volume status	doi.org/10.1053/j.ackd.2021.02.003	Kaptein 2021
3.1	Assessment of free fluid in the abdominal cavity	doi:10.1136/rapm-2018-100312	Manson 2019
3.2	Assessment of free fluid around the heart with a subxyphoid view	doi: 10.1016/j.bjae.2017.10.003	Desai 2019
3.3	Assessment of a pneumothorax	doi.org/10.7863/jum.2012.31.3.501	Nobel 2012
3.4	Assessment of a haemothorax	doi.org/10.1186/s13089-020-00183-6	Jahanshir 2020
4.2.1	Assess the gallbladder for cholelithiasis	doi.org/10.1177%2F1742271X14546181	Woo 2014
4.2.2	Assess for acute cholecystitis	doi.org/10.1177%2F1742271X14546181	Woo 2014
4.2.3	Assess for common bile duct (CBD) obstruction (Choledocholithiasis)	DOI:10.1016/j.cult.2007.08.007	RUBENS 2007
4.2.4	Assess for hepato-splenomegaly	doi.org/10.7863/jum.2003.22.11.1155	Kratzer 2003
4.3.1	Assess for appendicitis	DOI: 10.1002/jcu.23033	kudasne 2021
4.3.2	Identify an abdominal wall hernia	doi.org/10.1007/s40477-020-00435-0	Draghi 2020
4.3.3	Identify an inguinal hernia	doi: 10.1097/RUQ.0b013e3181f0b23f	Stavros 2010
4.4.1	Assess renal size	DOI: 10.1177/1742271x15601617	Cox 2015
4.4.2	Identify and grade hydronephrosis	DOI: 10.3389/fped.2020.00458	Onen 2020
4.4.3	Identify urinary retention and post-void residual volume	DOI: 10.1080/003655902320131839	Hvarness 2002
4.4.4	Identify a varicocele	DOI: 10.1055/s-0036-1586147	Baigorri 2016
4.4.5	Identify a testicular torsion	10.1007/s00261-019-02333-4	Sweet 2019
4.4.6	Identify epididymo-orchitis	10.1007/s00261-019-02333-4	Sweet 2019
4.4.7	Asses prostate volume	DOI: 10.1089/end.2020.0874	Moussaoui 2021
5.1	Identify lower extremity DVT in low risk cases with 2-Zone discrimination technique	doi.org/10.1007/s11239-017-1595-9	Zucker-Herman 2017
5.2	Identify lower extremity DVT with colour Doppler, and graded compression of the entire limb	doi:�10.14366/usg.17001	Lee 2017
5.3	Identify upper extremity DVT with colour Doppler, and graded compression of the entire limb	doi.org/10.1016/j.rcl.2007.04.005	Weber 2007
6.1	Differentiating between cellulitis and an abscess in soft tissue	doi:10.1136/bmjopen-2016-013688	Barbic 2017
6.2	Identification of a foreign body	doi.org/10.1007/s11751-018-0308-z	Tantray 2018
6.3	Identification of a joint effusions/bursitis	doi.org/10.1007/s43678-021-00184-x	Poonja 2021
6.4	Identification of long bone fractures	doi:10.7759/cureus.13046	Oluku 2021
6.5	Identification of tendon rupture/tear	doi.org/10.1053/j.ro.2020.09.004	Perone 2021
6.6	Identification of tendonitis/tendinopathy	doi.org/10.1055/s-0039-3402050	Chianca 2020
6.7	Identification of rotator cuff injury	doi:10.1016/j.cult.2007.11.003	Finlay 2007
6.8	Identification of a ligament injury of the knee	doi:10.1016/j.cult.2007.11.005	Miller 2007
6.9	Identification of a ligament injury of the ankle	doi:10.1016/j.cult.2007.11.005	Miller 2007
6.10	Assessment of carpal tunnel syndrome	doi:10.3390/diagnostics10080596	Yoshii 2020
7.1	Identification of pulmonary oedema	DOI: 10.11152/mu-1223	Wang 2018
7.2	Identification of a lobar pneumonia	DOI: 10.1097/RUQ.0000000000000330	Xin 2017
7.3	Identification of pneumothorax	DOI 10.1007/s13665-017-0164-1	Williamson 2017
7.4	Identification of pleural effusion or hemothorax	https://doi.org/10.1002/jhm.2434	Soni 2015
7.5	Assessment of pleural mass	DOI: 10.7759/cureus.5233	Raheja 2019
7.6	Identification of interstitial pneumonia	https://doi.org/10.1002/jum.15285	Soldati 2020
7.7	Identification of Acute Respiratory Distress Syndrome (ARDS)	DOI: 10.1097/CPM.0000000000000311	Mongodi 2019
7.8	Identification of chronic interstitial lung disease	https://doi.org/10.1002/jum.14406	Vassalou 2017
8.1	Identification of detached retina	doi:10.1111/acem.13682	Gottlieb 2019
8.2	Identification of vitreous detachment	doi:10.1001/jamanetworkopen.2019.2163	Lahham 2019
8.3	Identification of vitreous haemorrhage	doi:10.1001/jamanetworkopen.2019.2164	Lahham 2019
8.4	Identification of intraocular foreign body	doi:10.1097/mej.0000000000000070 and https://doi.org/10.1007/s10140-018-1655-2	Kilker 2014 and Tandon 2018
8.5	Measurement of posterior Ocular Nerve Sheath Diameter for assessment of intracranial pressure (papilledema)	doi:10.1002/jum.15732 and https://doi.org/10.1111/j.1553-2712.2003.tb01352.x	Aletreby 2020 and Blavias 2003
8.6	Identification of a lens dislocation	doi:10.1016/j.annemergmed.2019.02	Ojaghihaghighi 2019
9.1	Thoracentesis	DOI 10.1007/s13665-017-0164-1	Williamson 2017
9.2	Paracentesis	DOI 10.12788/jhm.3095	Cho 2019
9.3	Peripheral IV placement	doi.org/10.1016/j.chest.2019.04.139	Millington 2020
9.4	Central line placement	doi.org/10.1016/j.chest.2020.06.026	Millington 2020
9.5	Lumbar puncture	doi:10.1016/j.ccc.2010.07.002	Strony 2010
9.6	Knee aspiration and injection	doi.org/10.1007/s43678-021-00184-x	Poonja 2021
9.7	Foreign body identification and removal	doi.org/10.1007/s11751-018-0308-z	Tantray 2018
9.8	Fine needle aspiration/biopsy	doi.org/10.1053/j.semdp.2022.06.007	Lynn 2022
9.9	Shoulder, ankle, hip, wrist aspiration, and injection	doi.org/10.1016/j.pmr.2022.01.005	Marcolina 2020
9.10	Peripheral nerve blocks	doi.org/10.1002/aorn.12781	Pincus 2019
10.1	FAST/E-FAST: Focused assessment with sonography for trauma	doi:10.1136/rapm-2018-100312	Manson 2019
10.2	RUSH: Rapid ultrasound for shock and hypotension	doi:10.1016/j.cult.2011.12.010	Perera 2012
10.3	BLUE: Bedside lung ultrasound in emergency	DOI: 10.1378/chest.07-2800	Lichenstein 2008
10.4	CLUE: Cardiac limited ultrasound exam	doi:10.7863/ultra.15.14.09002	Kimura 2015
10.5	FEEDS criteria: To determine presence IUP	http://www.teachtraining.org/wp-content/uploads/2013/10/chap3-7.4.12.pdf
